# Supplementary material
Source: publisher site journal article supplement (https://static.cambridge.org/content/id/urn:cambridge.org:id:article:S0022109018000868/resource/name/S0022109018000868supp001.zip)

## Internet Appendix

### “Attitudes towards Non-compliance and the Demand for External Finance”

**Table A.1**

#### **Non-Compliance and Borrowing Decisions with Discrete Definition of Non-Compliance**

The table reports coefficient estimates from individual-level OLS regressions of an indicator for respondent's borrowing activity over the previous year on the respondent's non-compliance index (an indicator for positive response to at least one of the variables CLAIMING\_GOVERNMENT\_BENEFITS, AVOIDING\_FARE, CHEATING\_ON\_TAXES, and ACCEPTING\_A\_BRIBE, defined in the Appendix); (log of) respondent's age, education, employment, income decile within the country, gender, and marital status; indicators for Protestant, Catholic, Muslim, Hindu, and Jewish religion; the respondent's willingness to tolerate risk and propensity to save; an assessment for the importance of friends in respondent's life (SOCIABILITY); and interpersonal trust. Precise definitions of the variables are outlined in the Appendix. The first two models include country and year fixed effects, while the last two models include (country) x (income decile) and year fixed effects. Standard errors in all models are adjusted for clustering at the country-level. (\*\*\*), (\*\*), and (\*) indicate statistical significance at the 0.01, 0.05 and 0.10 level, respectively.

|                                    | 1         | 2         | 3        | 4         |
|------------------------------------|-----------|-----------|----------|-----------|
| NON-COMPLIANCE                     | 0.030***  | 0.037***  | 0.029*** | 0.033***  |
| AGE                                | -0.009    | -0.027**  | -0.011*  | -0.034*** |
| EDUCATION                          | -0.013**  | -0.016    | -0.008*  | -0.004    |
| EMPLOYMENT                         | -0.010**  | -0.018**  | -0.011** | -0.011*   |
| INCOME                             | -0.018*** | -0.012*** |          |           |
| FEMALE                             | 0.013***  | 0.010**   | 0.012*** | 0.010**   |
| MARRIED                            | 0.009*    | 0.013**   | 0.008*   | 0.014*    |
| PROTESTANT                         | -0.018**  | -0.009    | -0.013   | -0.007    |
| CATHOLIC                           | -0.012*** | -0.015*   | -0.010** | -0.013    |
| MUSLIM                             | -0.014    | 0.004     | -0.013   | -0.004    |
| HINDU                              | -0.020    | -0.016    | -0.015   | -0.010    |
| JEWISH                             | -0.017    | 0.010     | -0.016   | -0.007    |
| RISK_TAKING                        |           | 0.005***  |          | 0.005***  |
| THRIFT                             |           | -0.001    |          | -0.002    |
| SOCIABILITY                        |           | -0.011**  |          | -0.009*   |
| TRUST                              |           | 0.001     |          | -0.001    |
| Country Fixed Effects              | Yes       | Yes       | No       | No        |
| (Country) X (Income) Fixed Effects | No        | No        | Yes      | Yes       |
| Year Fixed Effects                 | Yes       | Yes       | Yes      | Yes       |
| Adj. R-squared                     | 6.01      | 7.00      | 8.07     | 8.98      |
| Num. Observations                  | 163,747   | 43,896    | 163,747  | 43,896    |

**Table A.2**

**Non-Compliance and Borrowing Decisions with Discrete Definition of Non-compliance: Robustness**

The table reports coefficient estimates and t-values from individual-level OLS regressions of an indicator for respondent's borrowing activity over the previous year on the respondent's non-compliance index (an indicator for positive response to at least one of the variables CLAIMING\_GOVERNMENT\_BENEFITS, AVOIDING\_FARE, CHEATING\_ON\_TAXES, and ACCEPTING\_A\_BRIBE, defined in Table 3). The models in Panel A are estimated over quintiles based on non-compliance propensity scores, calculated as the predicted probability for non-compliance based on the variables in the first model of Table 4. The models in Panel B are estimated over respondent's income quintiles. The models in Panel C are estimated over quintiles based on respondent's risk-tolerance. The models in Panel D are estimated over quintiles of country-level freedom of expression (based on the Voice and Accountability index in the WB Worldwide Governance Indicators). All models also include individual controls and country- and year-fixed effects. Standard errors are adjusted for clustering at the country-level. Precise definitions of the variables are outlined in the Appendix. (\*\*\*), (\*\*), and (\*) indicate statistical significance at the 0.01, 0.05 and 0.10 level, respectively.

|                                                 | Quintile 1<br>(Low) | Quintile 2         | Quintile 3         | Quintile 4         | Quintile 5<br>(High) |
|-------------------------------------------------|---------------------|--------------------|--------------------|--------------------|----------------------|
| <b>Panel A: Non-Compliance Propensity Score</b> |                     |                    |                    |                    |                      |
| NON-COMPLIANCE                                  | 0.042***<br>(2.88)  | 0.022**<br>(2.49)  | 0.027***<br>(3.87) | 0.025***<br>(3.28) | 0.029***<br>(4.07)   |
| % Non-compliant                                 | 29.64               | 45.76              | 55.93              | 66.97              | 79.92                |
| Adj. R-squared                                  | 11.10               | 5.40               | 4.58               | 4.57               | 5.31                 |
| Num. Observations                               | 29,181              | 33,344             | 33,337             | 32,807             | 35,078               |
| <b>Panel B: Personal Income</b>                 |                     |                    |                    |                    |                      |
| NON-COMPLIANCE                                  | 0.040***<br>(5.77)  | 0.019***<br>(2.98) | 0.027***<br>(4.13) | 0.035***<br>(3.51) | 0.029***<br>(3.47)   |
| % Non-compliant                                 | 55.83               | 55.27              | 56.44              | 59.45              | 58.64                |
| Adj. R-squared                                  | 6.83                | 7.42               | 6.26               | 5.89               | 4.27                 |
| Num. Observations                               | 37,800              | 45,174             | 43,293             | 24,942             | 12,538               |
| <b>Panel C: Personal Risk-tolerance</b>         |                     |                    |                    |                    |                      |
| NON-COMPLIANCE                                  | 0.024*<br>(1.83)    | 0.028*<br>(1.96)   | 0.049***<br>(3.59) | 0.037***<br>(3.66) | 0.058***<br>(3.23)   |
| % Non-compliant                                 | 55.69               | 68.94              | 65.67              | 70.69              | 58.94                |
| Adj. R-squared                                  | 8.19                | 5.96               | 6.17               | 7.95               | 9.10                 |
| Num. Observations                               | 10,476              | 7,646              | 10,829             | 9,260              | 7,605                |
| <b>Panel D: Country Freedom of Expression</b>   |                     |                    |                    |                    |                      |
| NON-COMPLIANCE                                  | 0.015<br>(1.55)     | 0.031***<br>(3.40) | 0.041***<br>(5.96) | 0.049***<br>(3.85) | 0.010**<br>(2.22)    |
| % Non-compliant                                 | 47.14               | 54.09              | 65.48              | 58.55              | 58.86                |
| Adj. R-squared                                  | 8.53                | 6.54               | 7.36               | 4.00               | 3.18                 |
| Num. Observations                               | 33,380              | 35,549             | 26,833             | 27,947             | 30,396               |

**Table A.3**  
**Non-Compliance and Borrowing Decisions by Gender**

The table reports coefficient estimates from individual-level OLS regressions of an indicator for respondent's borrowing activity over the previous year on the respondent's non-compliance index (the average of the variables CLAIMING\_GOVERNMENT\_BENEFITS, AVOIDING\_FARE, CHEATING\_ON\_TAXES, and ACCEPTING\_A\_BRIBE, defined in Table 3); (log of) respondent's age, education, employment, income decile within the country, gender, and marital status; indicators for Protestant, Catholic, Muslim, Hindu, and Jewish religion; the respondent's willingness to tolerate risk and propensity to save; an assessment for the importance of friends in respondent's life (SOCIABILITY); and interpersonal trust. Precise definitions of the variables are outlined in the Appendix. The first column estimates the model across all male respondents, while the second model estimates the model across all female respondents from the World Values Survey. Standard errors in all models are adjusted for clustering at the country-level. (\*\*\*), (\*\*), and (\*) indicate statistical significance at the 0.01, 0.05 and 0.10 level, respectively.

|                       | Male<br>Respondents | Female<br>Respondents |
|-----------------------|---------------------|-----------------------|
| NON-COMPLIANCE        | 0.011***            | 0.010***              |
| AGE                   | -0.010              | -0.006                |
| EDUCATION             | -0.018***           | -0.007                |
| EMPLOYMENT            | -0.021***           | -0.001                |
| INCOME                | -0.019***           | -0.017***             |
| MARRIED               | 0.010**             | 0.010*                |
| PROTESTANT            | -0.016              | -0.018*               |
| CATHOLIC              | -0.006              | -0.018***             |
| MUSLIM                | -0.011              | -0.015                |
| HINDU                 | 0.009               | -0.053**              |
| JEWISH                | -0.029              | -0.001                |
| Country Fixed Effects | Yes                 | Yes                   |
| Year Fixed Effects    | Yes                 | Yes                   |
| Adj. R-squared        | 6.08                | 6.11                  |
| Num. Observations     | 80,408              | 83,339                |

**Table A.4**  
**Non-compliance and Borrowing Decisions: Non-linear Effects**

The table reports coefficient estimates from individual-level OLS regressions of an indicator for respondent's borrowing activity over the previous year on the respondent's non-compliance (the average of the variables CLAIMING\_GOVERNMENT\_BENEFITS, AVOIDING\_FARE, CHEATING\_ON\_TAXES, and ACCEPTING\_A\_BRIBE, defined in Table 3); the respondent's non-compliance squared; (log of) respondent's age, education, employment, income decile within the country, gender, and marital status; indicators for Protestant, Catholic, Muslim, Hindu, and Jewish religion; the respondent's willingness to tolerate risk and propensity to save; an assessment for the importance of friends in respondent's life (SOCIABILITY); and interpersonal trust. Precise definitions of the variables are outlined in the Appendix. The first two models include country and year fixed effects, while the last two models include (country) x (income decile) and year fixed effects. Standard errors in all models are adjusted for clustering at the country-level. (\*\*\*), (\*\*), and (\*) indicate statistical significance at the 0.01, 0.05 and 0.10 level, respectively.

|                                    | 1         | 2         | 3        | 4         |
|------------------------------------|-----------|-----------|----------|-----------|
| NON-COMPLIANCE                     | 0.020***  | 0.023***  | 0.020*** | 0.020***  |
| NON-COMPLIANCE (squared)           | -0.001**  | -0.001    | -0.001** | -0.001    |
| AGE                                | -0.007    | -0.024*   | -0.010   | -0.030*** |
| EDUCATION                          | -0.012**  | -0.015    | -0.008   | -0.003    |
| EMPLOYMENT                         | -0.010**  | -0.017**  | -0.011** | -0.011*   |
| INCOME                             | -0.018*** | -0.013*** |          |           |
| FEMALE                             | 0.013***  | 0.011**   | 0.013*** | 0.011**   |
| MARRIED                            | 0.010**   | 0.014**   | 0.009**  | 0.015**   |
| PROTESTANT                         | -0.017*   | -0.008    | -0.012   | -0.006    |
| CATHOLIC                           | -0.012**  | -0.013*   | -0.010** | -0.012    |
| MUSLIM                             | -0.013    | 0.006     | -0.012   | -0.003    |
| HINDU                              | -0.019    | -0.013    | -0.015   | -0.008    |
| JEWISH                             | -0.017    | 0.012     | -0.016   | -0.006    |
| RISK_TAKING                        |           | 0.005***  |          | 0.005***  |
| THRIFT                             |           | -0.001    |          | -0.003    |
| SOCIABILITY                        |           | -0.011**  |          | -0.009*   |
| TRUST                              |           | 0.001     |          | 0.000     |
| INTERCEPT                          | 0.351***  | 0.419***  | 0.153*** | 0.332***  |
| Country Fixed Effects              | Yes       | Yes       | No       | No        |
| (Country) X (Income) Fixed Effects | No        | No        | Yes      | Yes       |
| Year Fixed Effects                 | Yes       | Yes       | Yes      | Yes       |
| Adj. R-squared                     | 6.07      | 7.12      | 8.13     | 9.09      |
| Num. Observations                  | 163,747   | 43,896    | 163,747  | 43,896    |

**Table A.5**  
**Distribution of the Non-compliance Variable**

The table reports the distribution of respondent's non-compliance (the average of the variables CLAIMING\_GOVERNMENT\_BENEFITS, AVOIDING\_FARE, CHEATING\_ON\_TAXES, and ACCEPTING\_A\_BRIBE, defined in Table 3) across various levels of non-compliance.

| Non-compliance level | Percent (%) |
|----------------------|-------------|
| 1                    | 42.9        |
| [1, 2]               | 19.9        |
| [2, 3]               | 13.4        |
| [3, 4]               | 10.1        |
| [4, 5]               | 5.7         |
| [5, 6]               | 4.0         |
| [6, 7]               | 1.8         |
| [7, 8]               | 1.1         |
| [8, 9]               | 0.5         |
| [9, 10]              | 0.6         |
| <i>Total [1, 10]</i> | <i>100</i>  |

**Table A.6**  
**Cross-correlations of CEO Personal Characteristics**

The table reports correlations of the following CEO characteristics – mortgage amount (measured at the time of origination); NON-COMPLIANT\_CEO (an executive with at least one legal infraction); estimated CEO wealth; indicators for military service, female gender, an MBA-degree, people born during an NBER defined recession, and people who began their career during an NBER defined recession; CEO materialism, an indicator variable set to 1 if the individual owns any of the following assets: vehicle with a list price greater than \$75k, boat longer than 25 feet, or home worth more than 2 times the median home prices in the Core Based Statistical Area of his firm’s headquarters; and the purchase price of the home expressed (in millions). (\*) indicates statistical significance at the 0.10 level.

|                          | 1     | 2      | 3     | 4      | 5      | 6     | 7     | 8     | 9     | 10   |
|--------------------------|-------|--------|-------|--------|--------|-------|-------|-------|-------|------|
| 1. MORTGAGE              | 1.00  |        |       |        |        |       |       |       |       |      |
| 2. NON-COMPLIANT_CEO     | 0.11* | 1.00   |       |        |        |       |       |       |       |      |
| 3. WEALTH                | 0.06* | -0.03  | 1.00  |        |        |       |       |       |       |      |
| 4. MILITARY              | 0.01  | 0.04   | 0.05  | 1.00   |        |       |       |       |       |      |
| 5. FEMALE                | -0.04 | -0.05  | -0.05 | -0.06* | 1.00   |       |       |       |       |      |
| 6. MBA_DEGREE            | 0.10* | -0.05  | 0.00  | 0.12*  | -0.13* | 1.00  |       |       |       |      |
| 7. BORN_IN RECESSION     | -0.02 | 0.03   | 0.02  | -0.07* | 0.06*  | -0.05 | 1.00  |       |       |      |
| 8. WORKED_IN RECESSION   | -0.03 | -0.08* | 0.03  | 0.01   | -0.09* | 0.01  | -0.04 | 1.00  |       |      |
| 9. MATERIALISM           | 0.06* | -0.07* | -0.02 | 0.03   | 0.01   | 0.00  | 0.02  | 0.11* | 1.00  |      |
| 10. HOUSE_PURCHASE_PRICE | 0.89* | 0.09*  | 0.04  | 0.02   | -0.04  | 0.07* | -0.04 | -0.02 | 0.08* | 1.00 |

**Table A.7****CEO Non-compliance and Personal Home Mortgage: Including Regional Controls**

The table reports coefficient estimates and t-statistics from individual-level OLS regressions of CEO mortgage amount (in 2010 dollars) on an indicator variable for a Non-compliant CEO (an executive with at least one legal infraction); an indicator variable for a Non-compliant CEO with traffic violations only; and an indicator variable for a Non-compliant CEO with at least one non-traffic violation. All other independent variables include estimated CEO wealth; indicators for military service, female gender, an MBA-degree, people born during an NBER defined recession, and people who began their career during an NBER defined recession; CEO materialism, an indicator variable set to 1 if the individual owns any of the following assets: vehicle with a list price greater than \$75k, boat longer than 25 feet, or home worth more than 2 times the median home prices in the Core Based Statistical Area of his firm's headquarters; the purchase price of the home (in 2010 dollars); and the average income, (Log) of average annual mortgage payments, the fraction of people employed in Finance, and (Log) of the home-ownership rate in the CEO PUMA of residence over the 1988-2012 period. Precise definitions of the variables are outlined in the Appendix. (\*\*\*), (\*\*), and (\*) indicate statistical significance at the 0.01, 0.05 and 0.10 level, respectively.

|                           | 1                    | 2                    | 3                    | 4                    |
|---------------------------|----------------------|----------------------|----------------------|----------------------|
| NON-COMPLIANT_CEO         | 0.446***<br>(2.90)   |                      |                      |                      |
| NON-COMPLIANT_CEO_TRAFFIC |                      | 0.524***<br>(3.04)   |                      | 0.524***<br>(3.07)   |
| NON-COMPLIANT_CEO_OTHER   |                      |                      | 0.284**<br>(2.07)    | 0.280**<br>(2.00)    |
| WEALTH                    | 0.457<br>(1.55)      | 0.458<br>(1.55)      | 0.448<br>(1.51)      | 0.458<br>(1.55)      |
| MILITARY                  | -0.340*<br>(-1.68)   | -0.351*<br>(-1.73)   | -0.321<br>(-1.57)    | -0.351*<br>(-1.73)   |
| FEMALE                    | 0.438<br>(1.33)      | 0.440<br>(1.34)      | 0.342<br>(1.04)      | 0.439<br>(1.34)      |
| MBA_DEGREE                | 0.345***<br>(2.87)   | 0.356***<br>(2.96)   | 0.326***<br>(2.70)   | 0.356***<br>(2.96)   |
| BORN_IN RECESSION         | -0.035<br>(-0.29)    | -0.032<br>(-0.27)    | -0.029<br>(-0.23)    | -0.032<br>(-0.26)    |
| WORKED_IN RECESSION       | 0.006<br>(0.04)      | 0.002<br>(0.01)      | -0.030<br>(-0.21)    | 0.001<br>(0.01)      |
| MATERIALISM               | 0.018<br>(0.15)      | 0.012<br>(0.10)      | -0.008<br>(-0.07)    | 0.011<br>(0.09)      |
| HOUSE_PURCHASE_PRICE      | 0.952***<br>(69.74)  | 0.951***<br>(69.53)  | 0.957***<br>(70.15)  | 0.951***<br>(69.47)  |
| AVERAGE_INCOME            | -0.022<br>(-0.05)    | 0.021<br>(0.05)      | -0.011<br>(-0.03)    | 0.023<br>(0.06)      |
| AVERAGE_MORTGAGE          | 0.356<br>(1.34)      | 0.325<br>(1.23)      | 0.281<br>(1.05)      | 0.323<br>(1.22)      |
| FRACTION_IN_FINANCE       | -9.031***<br>(-2.74) | -9.367***<br>(-2.85) | -9.354***<br>(-2.82) | -9.381***<br>(-2.84) |
| HOME_OWNERSHIP            | -0.760<br>(-1.41)    | -0.728<br>(-1.36)    | -0.553<br>(-1.02)    | -0.726<br>(-1.35)    |
| Adj. R-squared            | 0.87                 | 0.87                 | 0.87                 | 0.87                 |
| Num. Observations         | 756                  | 712                  | 620                  | 756                  |

**Figure A.1**

**Quadratic-regression of Borrowing and Non-compliance**

The figure presents a graphical display of the non-compliance and borrowing relationship tabulated in model (1) of Table A.4.

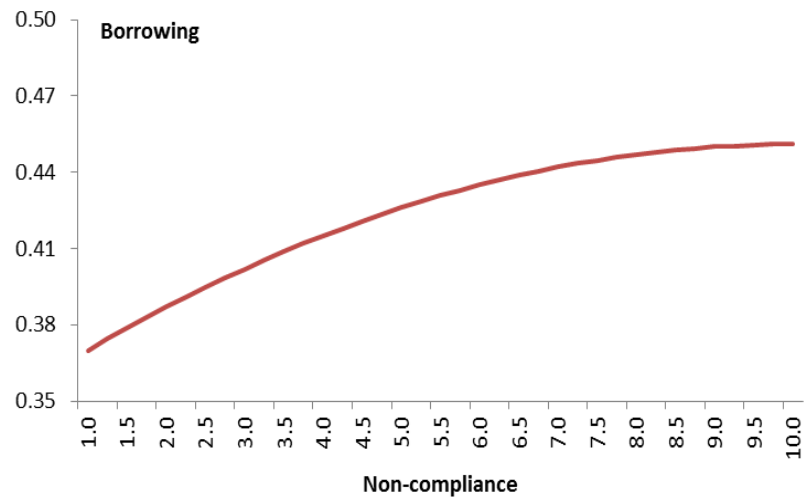

Supplement: Supplementary file 1 [file S0022109018000868supp001.zip]
